# Supplementary material for: Qa-1-Restricted CD8+ T Cells Can Compensate for the Absence of Conventional T Cells during Viral Infection
Source: PubMed Central journal article supplement — Cell Rep. Author manuscript; Available in PMC 2019 Apr 18. (PMC6472915; doi:10.1016/j.celrep.2019.03.059), 2019-04-09
Supplement: NIHMS1526697-supplement-1.pdf [file NIHMS1526697-supplement-1.pdf]

**Cell Reports, Volume 27**

**Supplemental Information**

**Qa-1-Restricted CD8<sup>+</sup> T Cells  
Can Compensate for the Absence  
of Conventional T Cells during Viral Infection**

**Courtney K. Anderson, Emma C. Reilly, Angus Y. Lee, and Laurent Brossay**

## Supplementary Figure 1

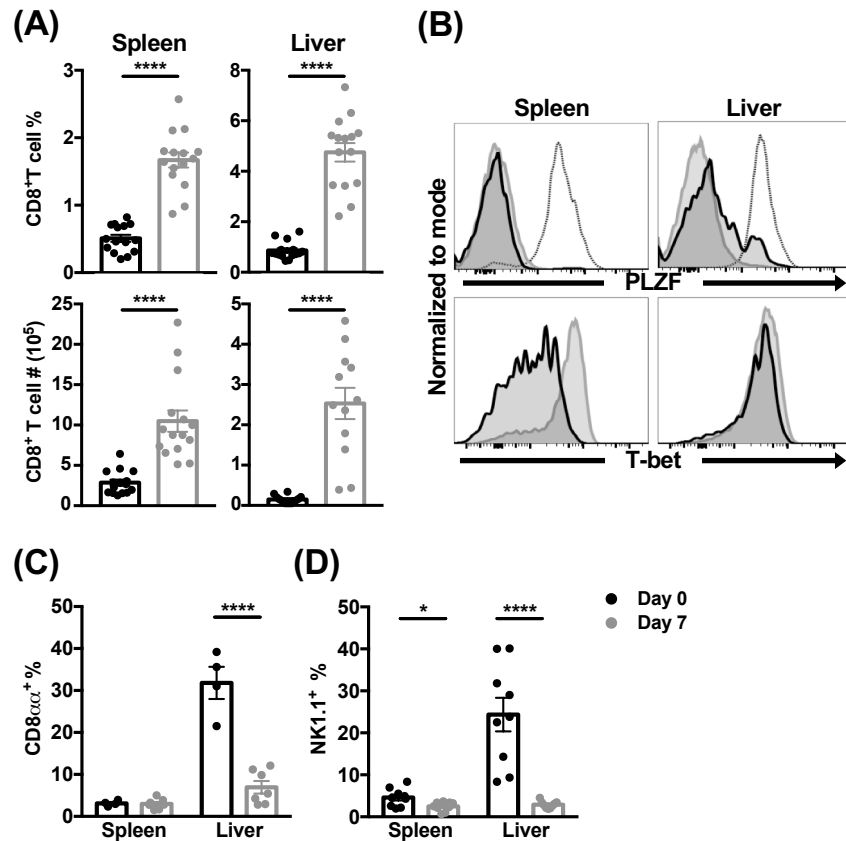

**Supplementary Figure 1. MCMV-expanded non-classical CD8<sup>+</sup> T cells are distinct from innate-like T cells. Related to Figure 1.** (A) Frequency and number of CD8<sup>+</sup> T cells in the spleen and liver of K<sup>b</sup>D<sup>b</sup><sup>-/-</sup> mice on day 0 and day 7 post-MCMV infection (n=12-15). (B) Representative histograms of PLZF and T-bet expression of CD8<sup>+</sup> T cells from the spleen and liver of K<sup>b</sup>D<sup>b</sup><sup>-/-</sup> mice on day 0 (black line) and 7 (grey line) post-MCMV infection. iNKT cells were used as positive control for PLZF (dotted line). Frequency of CD8<sup>+</sup> T cells that are (C) CD8αα<sup>+</sup> (n=4-7) or (D) NK1.1<sup>+</sup> (n=9) from the spleen and liver of K<sup>b</sup>D<sup>b</sup><sup>-/-</sup> on day 0 and 7 post-MCMV infection. Data are pooled from at least three (A, D) or two (C) independent experiments. Data represent mean ± SEM. \*p<0.05 and \*\*\*\*p<0.0001.

## Supplementary Figure 2

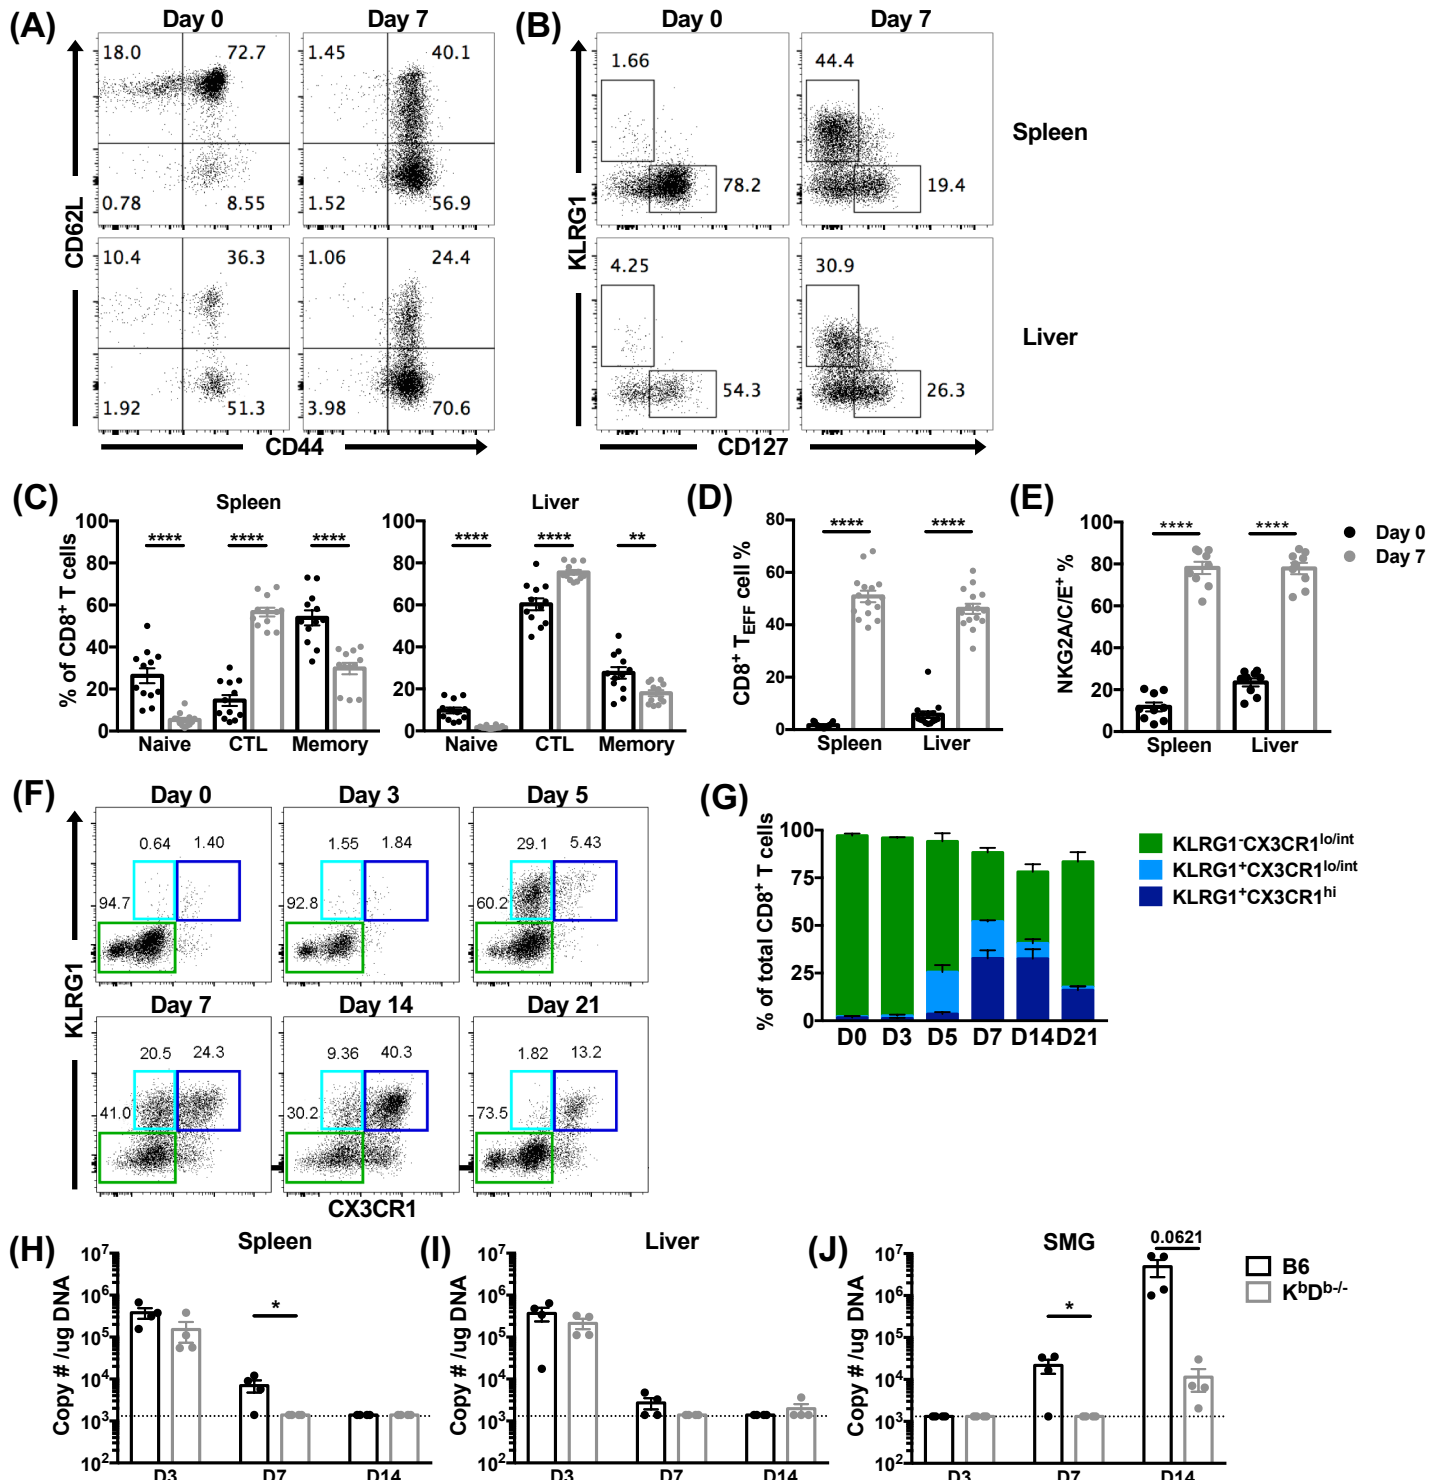

**Supplementary Figure 2. Non-classical CD8<sup>+</sup> T cells acquire an effector phenotype following acute MCMV infection. Related to Figure 1.** (A) CD44 and CD62L expression and (B) CD127 and KLRG1 expression of CD8<sup>+</sup> T cells from the spleen and liver of K<sup>b</sup>D<sup>b</sup>-/- mice on day 0 and 7 post-MCMV infection. (C) Frequency of naïve (CD62L<sup>+</sup>CD44<sup>-</sup>), CTL (CD62L<sup>-</sup>CD44<sup>+</sup>), and memory (CD62L<sup>+</sup>CD44<sup>+</sup>) CD8<sup>+</sup> T cells in the spleen and liver of K<sup>b</sup>D<sup>b</sup>-/- mice on day 0 and day 7 post-infection (n=12). (D) Frequency of CD8<sup>+</sup> T<sub>EFF</sub> cells (KLRG1<sup>+</sup>CD127<sup>+</sup>) in the spleen and liver of K<sup>b</sup>D<sup>b</sup>-/- mice on day 0 and day 7 post infection (n=15). (E) Frequency of NKG2A/C/E<sup>+</sup> CD8<sup>+</sup> T cells in the spleen and liver of K<sup>b</sup>D<sup>b</sup>-/- mice on day 0 and day 7 post-infection (n=9). (F) Expression and (G) frequency of CD8<sup>+</sup> T cells that are CX3CR1<sup>hi</sup>KLRG1<sup>+</sup> from the spleen and liver of K<sup>b</sup>D<sup>b</sup>-/- mice on indicated day post-MCMV infection (n=3). Viral quantification of the MCMV gene *IE1* by qPCR in the (H) spleen, (I) liver, and (J) SMG of K<sup>b</sup>D<sup>b</sup>-/- and C57BL/6 mice on indicated days post-infection (n=4). Dotted line is limit of detection. Data are pooled or representative of at least three (A-E) or one (F-J) independent experiment. Data represent mean ± SEM. \*p<0.05, \*\*p<0.01 and \*\*\*\*p<0.0001.

## Supplementary Figure 3

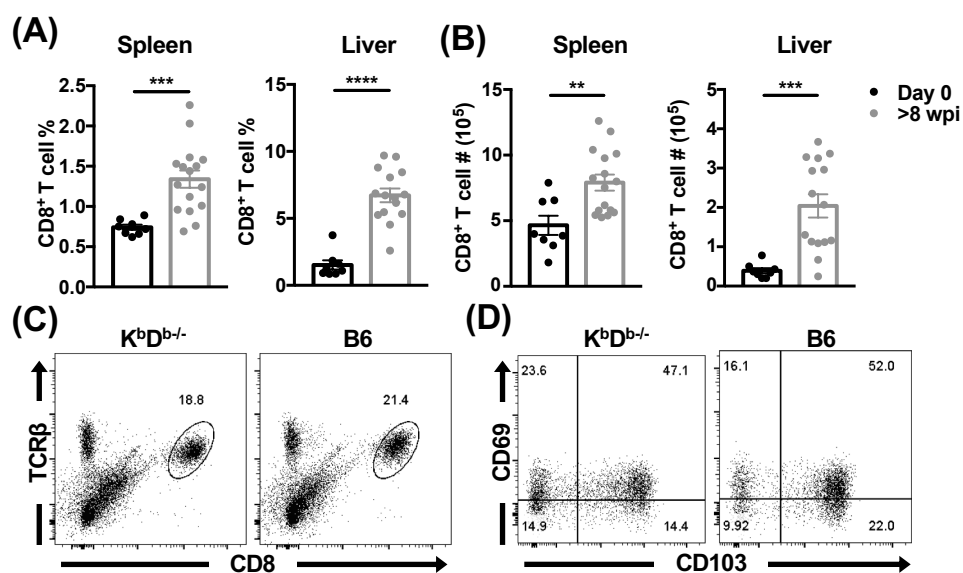

**Supplemental Figure 3. Non-classical CD8<sup>+</sup> T cells persist in long-term MCMV-infected K<sup>b</sup>D<sup>b</sup><sup>-/-</sup> mice and form memory populations. Related to Figure 4.** (A) Frequency and (B) number of CD8<sup>+</sup> T cells in the spleen and liver from naïve (n=8) and long-term infected K<sup>b</sup>D<sup>b</sup><sup>-/-</sup> mice (n=15-16). (C) Representative CD8<sup>+</sup> T cells in the SMG of long-term infected K<sup>b</sup>D<sup>b</sup><sup>-/-</sup> and C57BL/6 mice. (D) CD103 and CD69 expression of SMG CD8<sup>+</sup> T cells from long-term infected K<sup>b</sup>D<sup>b</sup><sup>-/-</sup> and C57BL/6 mice. Data are representative of two (C-D) or pooled from three (A, B) independent experiments and represent mean ± SEM. \*\*p<0.01, \*\*\*p<0.001 and \*\*\*\*p<0.0001.

## Supplementary Figure 4

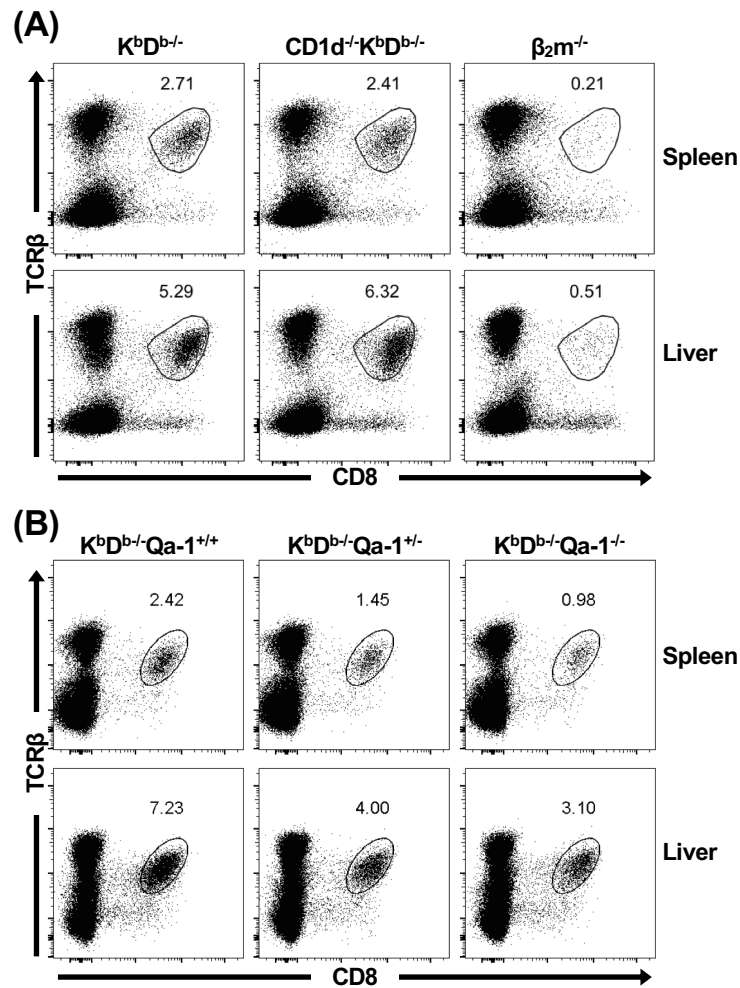

**Supplementary Figure 4. Non-classical CD8<sup>+</sup> T cell expansion following MCMV infection is Qa-1- and  $\beta_2m$ -dependent. Related to Figures 6 and 7.** (A) Representative staining of non-classical CD8<sup>+</sup> T cells in the spleen and liver of  $K^bD^b^{-/-}$ ,  $CD1d^{-/-}K^bD^b^{-/-}$ , and  $\beta_2m^{-/-}$  mice on day 7 post-MCMV infection. (B) Representative staining of non-classical CD8<sup>+</sup> T cells in the spleen and liver on day 7 post-MCMV infection from  $K^bD^b^{-/-}Qa-1^{+/+}$ ,  $K^bD^b^{-/-}Qa-1^{+/-}$ , and  $K^bD^b^{-/-}Qa-1^{-/-}$  mice. Data are representative of at least two independent experiments.
